# Supplementary material
Source: PubMed Central journal article supplement (PMC6615971)
Supplement: NIHMS1028467-supplement-Supp_info.pdf [file NIHMS1028467-supplement-Supp_info.pdf]

Supporting Information  
for

**Valence-to-Core X-ray Emission Spectroscopy as a Probe of O-O Bond Activation in  
Cu<sub>2</sub>O<sub>2</sub> complexes**

George E. Cutsail III,<sup>[a]</sup> Nicole L. Gagnon,<sup>[b]</sup> Andrew D. Spaeth,<sup>[b]</sup> William B. Tolman<sup>[b,c]</sup> and  
Serena DeBeer\*<sup>[a]</sup>

- [a] Dr. G. E. Cutsail III, Prof. Dr. Serena DeBeer  
Inorganic Spectroscopy  
Max Planck Institute for Chemical Energy Conversion  
Stiftstraße 34-36  
D-45470 Mülheim an der Ruhr, Germany  
E-mail: serena.debeer@cec.mpg.de
- [b] Dr. N. L. Gagnon, Dr. A. D. Spaeth, Prof. Dr. W. B. Tolman  
Department of Chemistry, Center for Metals in Biocatalysis  
University of Minnesota  
207 Pleasant St. SE  
Minneapolis, Minnesota 55455, United States
- [c] Prof. Dr. W. B. Tolman (Present Address)  
Department of Chemistry  
One Brookings Hall  
Washington University in St. Louis  
St. Louis, MO, USA

|                                                                                                           |    |
|-----------------------------------------------------------------------------------------------------------|----|
| Experimental                                                                                              | 3  |
| Figure S1.                                                                                                | 4  |
| Figure S2.                                                                                                | 5  |
| Figure S3.                                                                                                | 6  |
| Figure S4.                                                                                                | 7  |
| Optimized Coordinates for $[(\text{DBED})_2\text{Cu}_2(\mu\text{-}\eta^2\text{:}\eta^2\text{-O}_2)]^{2+}$ | 8  |
| Optimized Coordinates for $[(\text{Me}_3\text{TACN})_2\text{Cu}_2(\mu\text{-O})_2]^{2+}$                  | 10 |
| Figure S5. Relaxed Surface Scan of O-O bond length with DBED ligands                                      | 12 |
| Coordinates for $[(\text{DBED})_2\text{Cu}_2(\text{O}_2)]^{2+}$ ; $d(\text{O-O}) = 1.485 \text{ \AA}$     | 12 |
| Coordinates for $[(\text{DBED})_2\text{Cu}_2(\text{O}_2)]^{2+}$ ; $d(\text{O-O}) = 1.60 \text{ \AA}$      | 13 |
| Coordinates for $[(\text{DBED})_2\text{Cu}_2(\text{O}_2)]^{2+}$ ; $d(\text{O-O}) = 1.70 \text{ \AA}$      | 15 |
| Coordinates for $[(\text{DBED})_2\text{Cu}_2(\text{O}_2)]^{2+}$ ; $d(\text{O-O}) = 1.80 \text{ \AA}$      | 16 |
| Coordinates for $[(\text{DBED})_2\text{Cu}_2(\text{O}_2)]^{2+}$ ; $d(\text{O-O}) = 1.90 \text{ \AA}$      | 18 |
| Coordinates for $[(\text{DBED})_2\text{Cu}_2(\text{O}_2)]^{2+}$ ; $d(\text{O-O}) = 2.10 \text{ \AA}$      | 20 |
| Coordinates for $[(\text{DBED})_2\text{Cu}_2(\text{O}_2)]^{2+}$ ; $d(\text{O-O}) = 2.30 \text{ \AA}$      | 21 |
| References                                                                                                | 23 |

## Experimental

All X-ray absorption and emission data were collected at beam line ID26 at the European Synchrotron Research Facility (ESRF) (6 GeV, 200 mA). All samples were kept at 20 K in a liquid helium cryostat. A Si(311) double crystal monochromator was employed with the incident energy calibrated to the first inflection point of a Cu foil at 8980.3 eV. Cu K $\beta$  high-energy fluorescence detected (HERFD) XAS was detected with a 1 m radius Johann spectrometer<sup>[1]</sup> equipped with five Si(553) analyzer crystals and a Ketek silicon-drift energy detector in a Rowland geometry at the maximum of the K $\beta$  emission. The spectrometer was calibrated by scanning of the elastic lines in the Cu K $\beta$  emission range. This resulted in an observed K $\beta$  emission maximum for anhydrous CuCl (Strem Chemicals) at 8903.6 eV (**Figure S4**). All XES spectra were collected non-resonantly with an incident energy of 9.5 keV.

Assessment of short (5 to 60 sec) XAS scans employing a fast scanning monochromator were used to maximize exposure times and assess radiation damage processes and dwell time limits. When necessary, the incident beam was attenuated by insertion of various numbers of aluminum foils into the beam path. Only scans that showed no evidence of radiation damage were included in the final analysis. The beam exposure limit per spot, as determined by this procedure, limited both the exposure times of XAS and XES measurements.

To increase efficiency of XES data collection, including increasing S/N and decreasing the overall deadtime of data collection because of motor movements (e.g. settling time), the VtC XES spectrum was collected in smaller segments on fresh spots to allow for increased dwell times. A small amount of energy overlap with the neighboring segments was collected for splining of complete spectrum over the VtC region. However, the simultaneous collection of TFY recorded by a diode detector directly above spectrometer's analyzer crystals is a good reporter of the sample's concentration at that sample spot and was utilized for normalization. All data were processed within Matlab 2017a. The integrated intensity of the Cu K $\beta$  mainline fit was normalized to a unit of 1 and used for the scaling of the VtC spectra.

DFT calculations were performed with the ORCA<sup>[2]</sup> electronic structure package (v 4.0) employing the BP86 functionals<sup>[3 5648]</sup> with the def2 variants of the all-electron Gaussian basis sets of split-valence (def2-SVP) and triple-valence (def2-TZVP) quality as developed by the Aldrichs group.<sup>[4]</sup> Calculation employed the resolution of identity approximation for the computation of the Coulomb terms.<sup>[5]</sup> Only the singlet spin multiplicity was calculated for all complexes as broken symmetry has been explored previously and shown not to be more stable.<sup>[6]</sup> VtC XES were calculated by a one electron method and corrected for spin-orbit coupling using spin-orbit mean-field methods.<sup>[7]</sup>

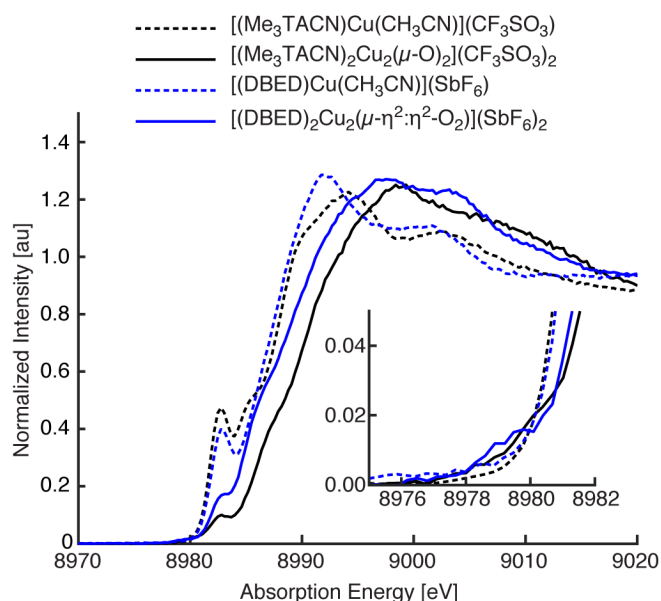

**Figure S1.** K $\beta$  HERFD of [(Me<sub>3</sub>TACN)Cu<sup>I</sup>(CH<sub>3</sub>CN)](CF<sub>3</sub>SO<sub>3</sub>), [(Me<sub>3</sub>TACN)<sub>2</sub>Cu<sup>III</sup><sub>2</sub>( $\mu$ -O)<sub>2</sub>](CF<sub>3</sub>SO<sub>3</sub>)<sub>2</sub>, [(DBED)Cu<sup>I</sup>(CH<sub>3</sub>CN)](SbF<sub>6</sub>) and [(DBED)<sub>2</sub>Cu<sup>II</sup><sub>2</sub>( $\mu$ - $\eta^2$ : $\eta^2$ -O<sub>2</sub>)](SbF<sub>6</sub>)<sub>2</sub>

The X-ray absorption edges of the Cu(I) precursor complexes exhibit the lowest energy features at 8982.7 eV, consistent with a the dipole allowed 1s to 4p transition of Cu(I) centers. The rising-edge of each precursor is low in energy, confirming the Cu(I) oxidation state. The closed-shell, d<sup>10</sup>, [(Me<sub>3</sub>TACN)Cu<sup>I</sup>(CH<sub>3</sub>CN)]<sup>+</sup> and [(DBED)Cu<sup>I</sup>(CH<sub>3</sub>CN)]<sup>+</sup> complexes exhibit no 1s to 3d pre-edge transitions, as expected.

Upon reaction with O<sub>2</sub>, the absorption edges of the reaction products, [(Me<sub>3</sub>TACN)<sub>2</sub>Cu<sub>2</sub>( $\mu$ -O)<sub>2</sub>]<sup>2+</sup> and [(DBED)<sub>2</sub>Cu<sub>2</sub>( $\mu$ - $\eta^2$ : $\eta^2$ -O<sub>2</sub>)]<sup>2+</sup>, exhibit edges shifted to higher energy than their precursors, [(Me<sub>3</sub>TACN)Cu<sup>I</sup>(CH<sub>3</sub>CN)]<sup>+</sup> and [(DBED)Cu<sup>I</sup>(CH<sub>3</sub>CN)]<sup>+</sup>, respectively. It is immediately observed that the edge of [(Me<sub>3</sub>TACN)<sub>2</sub>Cu<sub>2</sub>( $\mu$ -O)<sub>2</sub>]<sup>2+</sup> is at the highest energy, forming an energy trend of [(Me<sub>3</sub>TACN)Cu<sup>I</sup>(CH<sub>3</sub>CN)]<sup>+</sup>  $\approx$  [(DBED)Cu<sup>I</sup>(CH<sub>3</sub>CN)]<sup>+</sup> < [(DBED)<sub>2</sub>Cu<sub>2</sub>( $\mu$ - $\eta^2$ : $\eta^2$ -O<sub>2</sub>)]<sup>2+</sup>, < [(Me<sub>3</sub>TACN)<sub>2</sub>Cu<sub>2</sub>( $\mu$ -O)<sub>2</sub>]<sup>2+</sup>. Upon close inspection, a small pre-edge feature in both [(Me<sub>3</sub>TACN)<sub>2</sub>Cu<sub>2</sub>( $\mu$ -O)<sub>2</sub>]<sup>2+</sup> at ~8980 eV and [(DBED)<sub>2</sub>Cu<sub>2</sub>( $\mu$ - $\eta^2$ : $\eta^2$ -O<sub>2</sub>)]<sup>2+</sup>, at ~8979 eV are visible as low-energy shoulders at the onset of the rising edge, consistent with previous studies.<sup>[8]</sup> While K-edge 1s to 3d pre-edge transitions are dipole-forbidden and inherently weak, it is surprising that these pre-edges are not more pronounced in the HERFD-XAS, despite the improved baseline. These pre-edge transition for [(DBED)<sub>2</sub>Cu<sub>2</sub>( $\mu$ - $\eta^2$ : $\eta^2$ -O<sub>2</sub>)]<sup>2+</sup>, are slightly higher in energy than pre-edges typically observed for Cu(II) centers at ~8978 eV.<sup>[8]</sup>

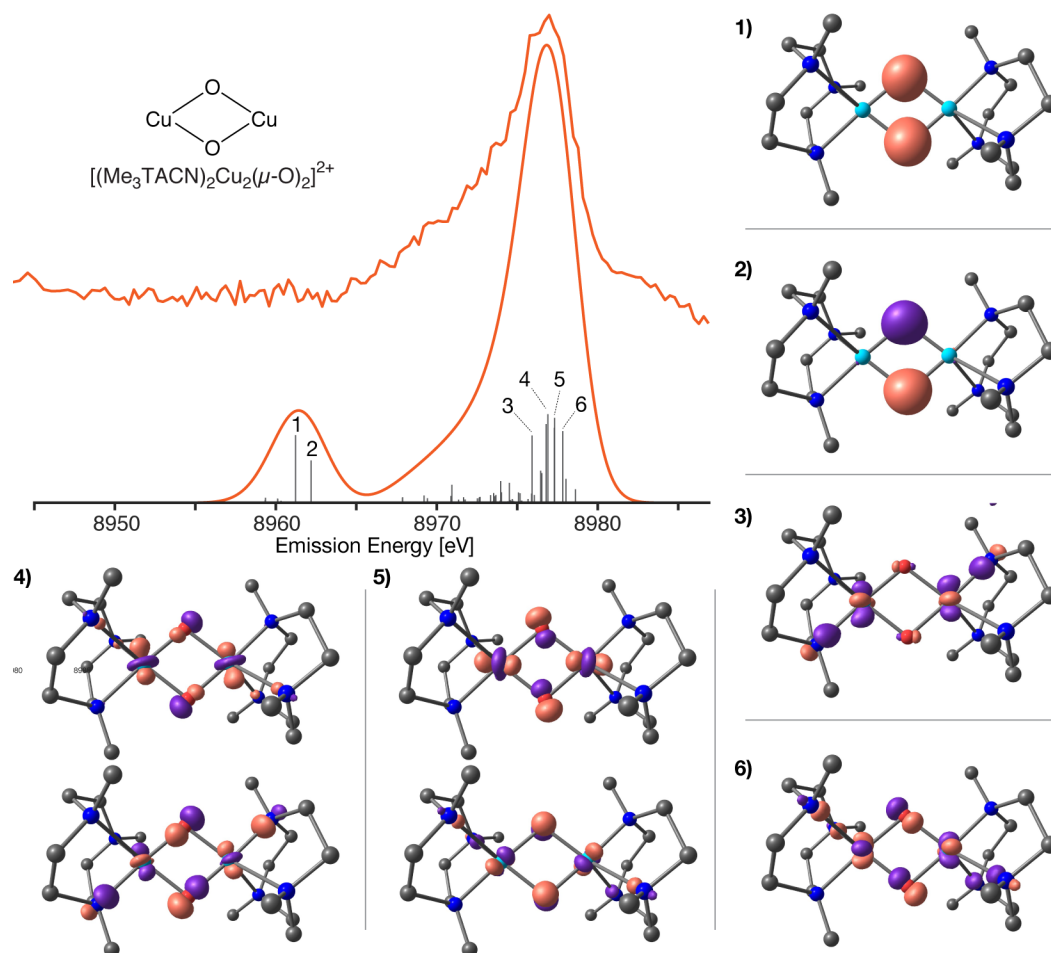

**Figure S2.** MO plots of additional selected VtC transitions of  $[(\text{Me}_3\text{TACN})_2\text{Cu}_2(\mu\text{-O})_2]^{2+}$ . MOs 1 and 2 exhibit the oxygen  $2s(\alpha), 2s(\alpha)$  and  $2s(\alpha), 2s(\beta)$  orbitals. Transitions in 4 shows the same multiple spin configuration of the O  $2p$  orbitals.

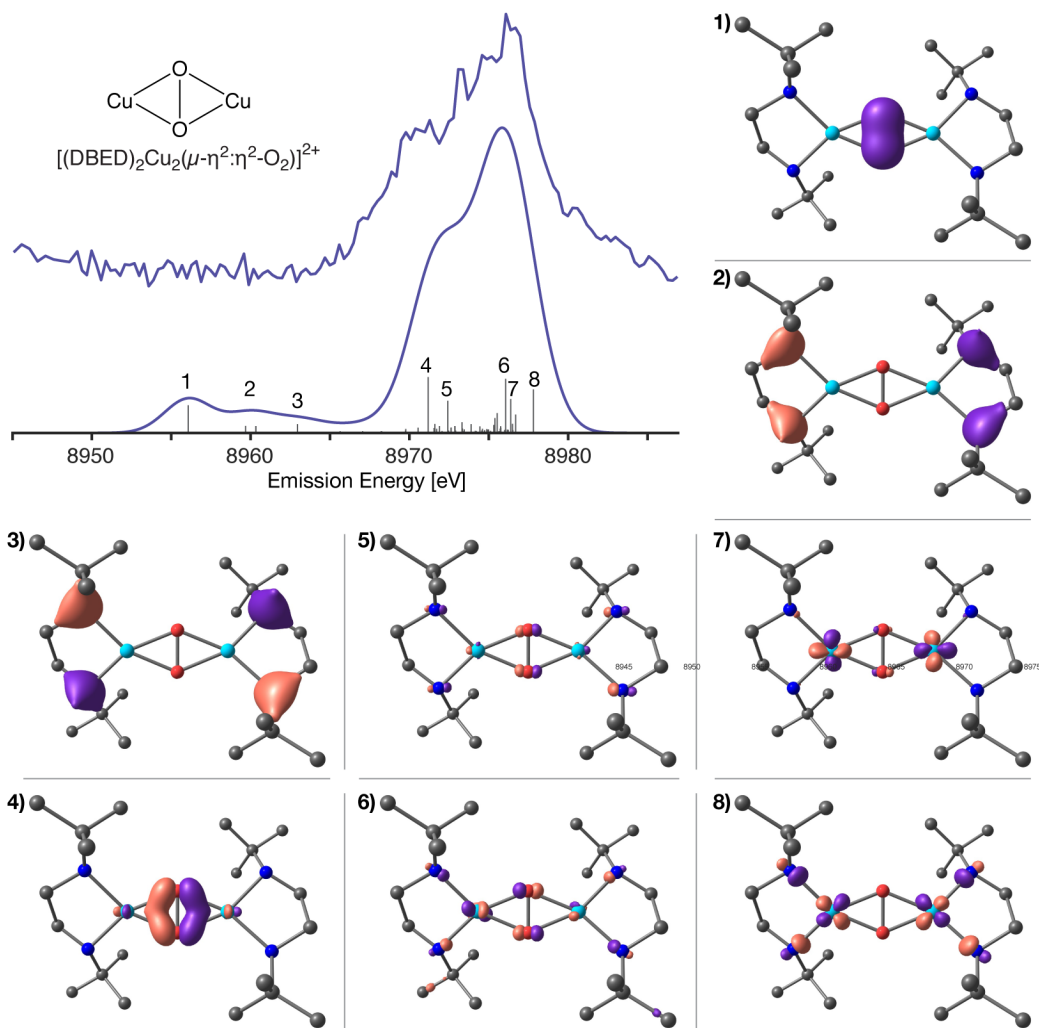

**Figure S3.** MO plots of additional selected VtC transitions of  $[(DBED)_2Cu_2(\mu-\eta^2:\eta^2-O_2)]^{2+}$ . MOs 2 and 3 exhibit the nitrogen 2s( $\alpha$ ), 2s( $\alpha$ ) and 2s( $\alpha$ ), 2s( $\beta$ ) orbitals. Diffuse ligand N and O 2p character is observed in higher energy transitions (6 – 8).

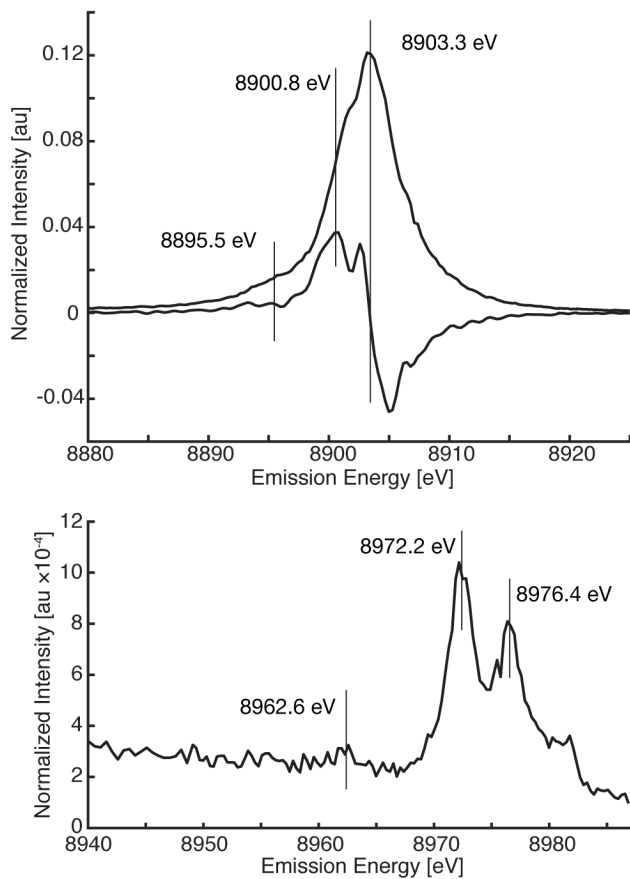

**Figure S4.** Calibrated Cu K $\beta$  mainline (top) and VtC emission of anhydrous CuCl collected with an incident energy of 9.5 keV.

### Optimized Coordinates for [(DBED)<sub>2</sub>Cu<sub>2</sub>(μ-η<sup>2</sup>:η<sup>2</sup>-O<sub>2</sub>)]<sup>2+</sup>

|    |           |           |           |
|----|-----------|-----------|-----------|
| Cu | 1.792896  | 0.000000  | 0.734090  |
| Cu | -1.793089 | -0.009039 | 0.732720  |
| O  | 0.000000  | 0.000000  | 1.484962  |
| O  | 0.000000  | 0.000000  | 0.000000  |
| N  | 3.225159  | -0.270333 | -0.687684 |
| H  | 3.279155  | 0.614522  | -1.212317 |
| N  | 3.264264  | 0.287817  | 2.104909  |
| H  | 3.404915  | -0.623821 | 2.564780  |
| N  | -3.268389 | -0.315977 | 2.096711  |
| H  | -3.436253 | 0.600555  | 2.536682  |
| N  | -3.222837 | 0.241146  | -0.696576 |
| H  | -3.241031 | -0.641853 | -1.226676 |
| C  | 4.495137  | -0.403888 | 0.091692  |
| H  | 5.381578  | -0.205810 | -0.543108 |
| H  | 4.570827  | -1.450147 | 0.448215  |
| C  | 2.962608  | -1.369260 | -1.731163 |
| C  | 4.248948  | -1.663466 | -2.528290 |
| H  | 5.031009  | -2.149120 | -1.913628 |
| H  | 4.672526  | -0.744876 | -2.983234 |
| H  | 4.013999  | -2.359173 | -3.357168 |
| C  | 2.466423  | -2.623711 | -0.997174 |
| H  | 3.221745  | -3.030452 | -0.295077 |
| H  | 2.245011  | -3.425767 | -1.728143 |
| H  | 1.529902  | -2.415906 | -0.436950 |
| C  | 1.880849  | -0.818997 | -2.670918 |
| H  | 1.631949  | -1.571716 | -3.442974 |
| H  | 2.224923  | 0.094379  | -3.199107 |
| H  | 0.949918  | -0.580675 | -2.120923 |
| C  | 4.475263  | 0.556201  | 1.271502  |
| H  | 5.406844  | 0.445002  | 1.862050  |
| H  | 4.427264  | 1.606430  | 0.921779  |
| C  | 2.987796  | 1.292707  | 3.234833  |
| C  | 4.286535  | 1.594557  | 4.008967  |
| H  | 4.048043  | 2.215745  | 4.894295  |
| H  | 5.022160  | 2.162868  | 3.407824  |
| H  | 4.767759  | 0.667339  | 4.383255  |
| C  | 2.400169  | 2.570453  | 2.617236  |
| H  | 1.454156  | 2.355757  | 2.076341  |
| H  | 3.106099  | 3.067516  | 1.922294  |
| H  | 2.168338  | 3.302619  | 3.414851  |
| C  | 1.974748  | 0.612951  | 4.167611  |
| H  | 1.041252  | 0.353611  | 3.630690  |
| H  | 1.710727  | 1.292294  | 5.000126  |
| H  | 2.394923  | -0.311176 | 4.617579  |
| C  | -4.461819 | -0.628899 | 1.252537  |
| H  | -5.402450 | -0.547075 | 1.833318  |
| H  | -4.374238 | -1.678119 | 0.906348  |
| C  | -2.983649 | -1.289856 | 3.249923  |
| C  | -1.977955 | -0.579005 | 4.166334  |
| H  | -1.722896 | -1.227185 | 5.026545  |



|   |           |           |           |
|---|-----------|-----------|-----------|
| H | -2.399634 | 0.361032  | 4.580968  |
| H | -1.039287 | -0.340368 | 3.628404  |
| C | -2.383844 | -2.578535 | 2.667698  |
| H | -3.087833 | -3.108740 | 1.994949  |
| H | -2.139371 | -3.282672 | 3.486637  |
| H | -1.443548 | -2.368838 | 2.115078  |
| C | -4.280635 | -1.585221 | 4.029011  |
| H | -5.011395 | -2.174409 | 3.441485  |
| H | -4.773049 | -0.655482 | 4.382972  |
| H | -4.035426 | -2.183714 | 4.928137  |
| C | -4.503877 | 0.327832  | 0.070262  |
| H | -5.376329 | 0.097202  | -0.573035 |
| H | -4.621299 | 1.370350  | 0.425922  |
| C | -2.990303 | 1.355579  | -1.730170 |
| C | -1.844402 | 0.878935  | -2.633779 |
| H | -0.912308 | 0.722773  | -2.057010 |
| H | -1.637339 | 1.640814  | -3.409637 |
| H | -2.102764 | -0.064900 | -3.157754 |
| C | -2.598871 | 2.637083  | -0.980281 |
| H | -3.409699 | 3.010910  | -0.324340 |
| H | -2.374804 | 3.444154  | -1.704674 |
| H | -1.686691 | 2.480497  | -0.365477 |
| C | -4.262590 | 1.571497  | -2.573970 |
| H | -4.600911 | 0.632482  | -3.058086 |
| H | -4.044418 | 2.295981  | -3.383086 |
| H | -5.102757 | 1.991107  | -1.987580 |

### Optimized Coordinates for $[(\text{Me}_3\text{TACN})_2\text{Cu}_2(\mu\text{-O})_2]^{2+}$

|    |           |           |           |
|----|-----------|-----------|-----------|
| Cu | 8.154655  | 1.013951  | 4.161386  |
| O  | 9.010997  | 1.616181  | 5.698949  |
| N  | 8.283084  | -0.731863 | 2.777376  |
| N  | 9.284690  | 1.977351  | 2.815500  |
| N  | 6.465231  | 1.531228  | 2.822065  |
| C  | 8.360377  | 3.031980  | 2.267877  |
| H  | 8.868828  | 3.595237  | 1.453780  |
| H  | 8.171977  | 3.744986  | 3.094704  |
| C  | 8.253592  | -2.009659 | 3.516451  |
| C  | 9.736561  | 0.999619  | 1.748477  |
| H  | 10.781440 | 1.229014  | 1.459298  |
| H  | 9.124429  | 1.162036  | 0.843671  |
| C  | 7.046967  | 2.425252  | 1.777059  |
| H  | 7.202841  | 1.848111  | 0.846032  |
| H  | 6.340542  | 3.239700  | 1.511205  |
| C  | 10.458415 | 2.619259  | 3.468284  |
| C  | 9.629547  | -0.447035 | 2.216542  |
| H  | 9.881963  | -1.132430 | 1.373334  |
| H  | 10.365872 | -0.643595 | 3.021718  |
| C  | 5.417250  | 2.207559  | 3.615078  |
| C  | 6.009581  | 0.217576  | 2.316909  |
| H  | 5.245097  | 0.329738  | 1.514355  |
| H  | 5.521627  | -0.294665 | 3.169458  |
| C  | 7.174279  | -0.636102 | 1.791579  |
| H  | 6.790026  | -1.647078 | 1.542953  |
| H  | 7.558407  | -0.225775 | 0.838791  |
| O  | 7.151295  | 0.218604  | 5.446070  |
| Cu | 8.008593  | 0.819699  | 6.983608  |
| N  | 7.893922  | 2.560391  | 8.372313  |
| N  | 6.877503  | -0.142378 | 8.329521  |
| N  | 9.699949  | 0.287895  | 8.317650  |
| C  | 7.797391  | -1.203727 | 8.871450  |
| H  | 7.287841  | -1.766822 | 9.684971  |
| H  | 7.979764  | -1.915054 | 8.041815  |
| C  | 7.928700  | 3.839883  | 7.636272  |
| C  | 6.433557  | 0.834556  | 9.400627  |
| H  | 5.388185  | 0.609958  | 9.691814  |
| H  | 7.047099  | 0.666337  | 10.303435 |
| C  | 9.115491  | -0.606061 | 9.361016  |
| H  | 8.965111  | -0.031325 | 10.294434 |
| H  | 9.817700  | -1.425533 | 9.622661  |
| C  | 5.698570  | -0.775919 | 7.677769  |
| C  | 6.547184  | 2.281720  | 8.935956  |
| H  | 6.300978  | 2.966677  | 9.781298  |
| H  | 5.810034  | 2.484180  | 8.133017  |
| C  | 10.742168 | -0.391763 | 7.520110  |
| C  | 10.163762 | 1.597490  | 8.825420  |
| H  | 10.929103 | 1.479317  | 9.626319  |
| H  | 10.653028 | 2.109365  | 7.973390  |
| C  | 9.004735  | 2.456093  | 9.355262  |

|   |           |           |           |
|---|-----------|-----------|-----------|
| H | 9.394778  | 3.464461  | 9.605406  |
| H | 8.620576  | 2.045517  | 10.307891 |
| H | 11.004859 | 3.248912  | 2.734124  |
| H | 11.134626 | 1.838797  | 3.859893  |
| H | 10.115854 | 3.240402  | 4.314781  |
| H | 5.151471  | -1.405996 | 8.411066  |
| H | 6.035512  | -1.395078 | 6.827533  |
| H | 5.024781  | 0.009516  | 7.291921  |
| H | 7.160886  | 3.833233  | 6.840453  |
| H | 8.915022  | 3.959290  | 7.152299  |
| H | 7.744803  | 4.702669  | 8.314596  |
| H | 9.018914  | -1.996503 | 4.314609  |
| H | 8.444651  | -2.873179 | 2.841007  |
| H | 7.266495  | -2.133846 | 3.997646  |
| H | 10.352015 | -1.353128 | 7.136766  |
| H | 11.009854 | 0.245341  | 6.656849  |
| H | 11.650220 | -0.595453 | 8.129216  |
| H | 5.800933  | 3.172425  | 3.996097  |
| H | 4.509606  | 2.403669  | 3.002945  |
| H | 5.151359  | 1.571713  | 4.479805  |

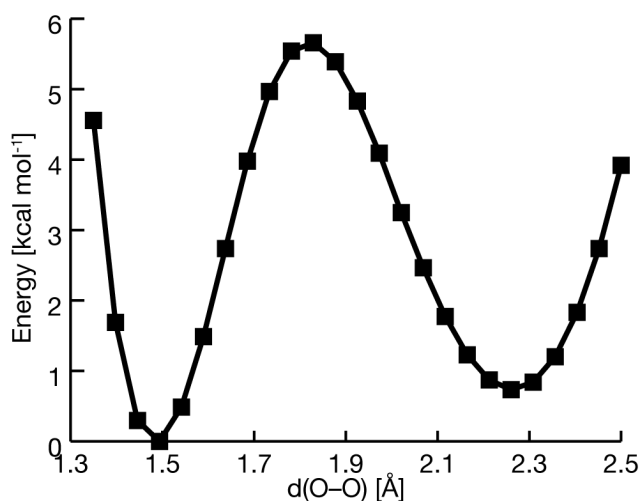

**Figure S5. Relaxed Surface Scan of O-O bond length with DBED ligands**

**Coordinates for [(DBED)<sub>2</sub>Cu<sub>2</sub>(O<sub>2</sub>)]<sup>2+</sup>; d(O-O) = 1.485 Å**

|    |          |           |          |
|----|----------|-----------|----------|
| Cu | 2.495559 | 8.570828  | 2.000783 |
| Cu | 4.276521 | 5.474200  | 2.315078 |
| O  | 2.843484 | 6.671964  | 1.773801 |
| O  | 3.919355 | 7.366299  | 2.525802 |
| N  | 2.683209 | 10.420388 | 2.831223 |
| H  | 3.458858 | 10.880636 | 2.333558 |
| N  | 0.908695 | 9.254946  | 0.932676 |
| H  | 0.070220 | 8.987718  | 1.469244 |
| N  | 3.876183 | 3.504615  | 2.012895 |
| H  | 4.078842 | 3.328588  | 1.018039 |
| N  | 6.142361 | 4.955877  | 2.947110 |
| H  | 6.113537 | 5.020060  | 3.974766 |
| C  | 1.423271 | 11.126753 | 2.442035 |
| H  | 1.536446 | 12.226448 | 2.518526 |
| H  | 0.627555 | 10.825997 | 3.151885 |
| C  | 3.044691 | 10.472505 | 4.325218 |
| C  | 2.841423 | 11.899598 | 4.871746 |
| H  | 1.775297 | 12.194933 | 4.909705 |
| H  | 3.398938 | 12.652770 | 4.278360 |
| H  | 3.226100 | 11.951856 | 5.908828 |
| C  | 2.160988 | 9.462241  | 5.071542 |
| H  | 1.082519 | 9.708556  | 4.999967 |
| H  | 2.417515 | 9.460253  | 6.148957 |
| H  | 2.320450 | 8.431403  | 4.689385 |
| C  | 4.526210 | 10.082810 | 4.422026 |
| H  | 4.849810 | 10.085748 | 5.480267 |
| H  | 5.173708 | 10.800498 | 3.876776 |
| H  | 4.704763 | 9.067350  | 4.018421 |
| C  | 1.037856 | 10.740998 | 1.021721 |
| H  | 0.093766 | 11.247933 | 0.737722 |

|   |           |           |           |
|---|-----------|-----------|-----------|
| H | 1.816952  | 11.063097 | 0.302795  |
| C | 0.708287  | 8.679399  | -0.478600 |
| C | -0.354102 | 9.496202  | -1.241035 |
| H | -0.579790 | 8.994745  | -2.202374 |
| H | -0.013214 | 10.520438 | -1.486441 |
| H | -1.307464 | 9.560104  | -0.676753 |
| C | 2.058329  | 8.704215  | -1.210805 |
| H | 2.817877  | 8.099546  | -0.671301 |
| H | 2.447729  | 9.733162  | -1.344915 |
| H | 1.946251  | 8.270630  | -2.223443 |
| C | 0.212094  | 7.239433  | -0.282152 |
| H | 0.941192  | 6.635221  | 0.292569  |
| H | 0.065421  | 6.751590  | -1.264390 |
| H | -0.764370 | 7.215856  | 0.246048  |
| C | 4.931862  | 2.809460  | 2.811084  |
| H | 5.018169  | 1.741542  | 2.526675  |
| H | 4.637959  | 2.846968  | 3.879078  |
| C | 2.434356  | 3.025619  | 2.238994  |
| C | 1.609971  | 3.600797  | 1.078757  |
| H | 0.550592  | 3.295342  | 1.176547  |
| H | 1.968684  | 3.222221  | 0.098240  |
| H | 1.646376  | 4.708024  | 1.066951  |
| C | 1.941811  | 3.569953  | 3.588255  |
| H | 2.526035  | 3.175936  | 4.444263  |
| H | 0.890985  | 3.263544  | 3.755927  |
| H | 1.973882  | 4.679934  | 3.608417  |
| C | 2.374578  | 1.485550  | 2.207840  |
| H | 2.882076  | 1.017099  | 3.073484  |
| H | 2.807362  | 1.072153  | 1.272976  |
| H | 1.315647  | 1.162892  | 2.244199  |
| C | 6.265779  | 3.507995  | 2.593424  |
| H | 7.055511  | 3.011587  | 3.191833  |
| H | 6.564378  | 3.438878  | 1.528912  |
| C | 7.307330  | 5.852074  | 2.495316  |
| C | 7.164201  | 7.172724  | 3.264773  |
| H | 6.208066  | 7.678017  | 3.027419  |
| H | 7.986735  | 7.859379  | 2.986867  |
| H | 7.221996  | 7.014609  | 4.361954  |
| C | 7.181167  | 6.083546  | 0.982600  |
| H | 7.287307  | 5.147962  | 0.398760  |
| H | 7.980027  | 6.768729  | 0.638121  |
| H | 6.207566  | 6.554354  | 0.727629  |
| C | 8.654556  | 5.189227  | 2.845961  |
| H | 8.725280  | 4.944159  | 3.925554  |
| H | 9.477877  | 5.893896  | 2.616338  |
| H | 8.848179  | 4.269999  | 2.260022  |

**Coordinates for [(DBED)<sub>2</sub>Cu<sub>2</sub>(O<sub>2</sub>)]<sup>2+</sup>; d(O–O) = 1.60 Å**

|    |          |          |          |
|----|----------|----------|----------|
| Cu | 2.514367 | 8.533232 | 2.007107 |
| Cu | 4.254832 | 5.510320 | 2.312076 |
| O  | 2.797760 | 6.643187 | 1.750957 |

|   |           |           |           |
|---|-----------|-----------|-----------|
| O | 3.961251  | 7.392221  | 2.554224  |
| N | 2.683838  | 10.378458 | 2.850936  |
| H | 3.465559  | 10.841112 | 2.364958  |
| N | 0.943036  | 9.229586  | 0.921539  |
| H | 0.097995  | 8.954557  | 1.443967  |
| N | 3.854265  | 3.536860  | 2.035450  |
| H | 4.045984  | 3.354051  | 1.039547  |
| N | 6.127449  | 4.991299  | 2.923522  |
| H | 6.109674  | 5.069303  | 3.950576  |
| C | 1.428982  | 11.088403 | 2.452819  |
| H | 1.540743  | 12.187168 | 2.542674  |
| H | 0.623697  | 10.779937 | 3.148518  |
| C | 3.028450  | 10.421212 | 4.349439  |
| C | 2.822201  | 11.846094 | 4.901057  |
| H | 1.756374  | 12.143481 | 4.929464  |
| H | 3.387600  | 12.601088 | 4.317480  |
| H | 3.196124  | 11.891891 | 5.942371  |
| C | 2.134467  | 9.408978  | 5.080765  |
| H | 1.057439  | 9.658436  | 4.999646  |
| H | 2.380120  | 9.400932  | 6.160680  |
| H | 2.295241  | 8.380111  | 4.694564  |
| C | 4.508021  | 10.028168 | 4.461118  |
| H | 4.820678  | 10.028188 | 5.522668  |
| H | 5.162913  | 10.744740 | 3.923283  |
| H | 4.687729  | 9.012433  | 4.057704  |
| C | 1.065818  | 10.715105 | 1.023911  |
| H | 0.125005  | 11.221251 | 0.728280  |
| H | 1.855712  | 11.045122 | 0.320381  |
| C | 0.763177  | 8.667979  | -0.498429 |
| C | -0.294675 | 9.487733  | -1.264481 |
| H | -0.507802 | 8.994087  | -2.232716 |
| H | 0.044540  | 10.515594 | -1.496754 |
| H | -1.254444 | 9.542228  | -0.710102 |
| C | 2.121318  | 8.708137  | -1.215085 |
| H | 2.878144  | 8.101437  | -0.674481 |
| H | 2.506813  | 9.740491  | -1.333334 |
| H | 2.021780  | 8.285870  | -2.233711 |
| C | 0.272411  | 7.223617  | -0.324117 |
| H | 0.999122  | 6.618115  | 0.252869  |
| H | 0.141173  | 6.745053  | -1.313123 |
| H | -0.709833 | 7.188464  | 0.192561  |
| C | 4.917022  | 2.845170  | 2.827271  |
| H | 4.996110  | 1.774619  | 2.550938  |
| H | 4.636015  | 2.892605  | 3.898289  |
| C | 2.414579  | 3.058684  | 2.280552  |
| C | 1.578159  | 3.623350  | 1.124043  |
| H | 0.519177  | 3.321422  | 1.236350  |
| H | 1.925683  | 3.235836  | 0.142977  |
| H | 1.616376  | 4.730747  | 1.102253  |
| C | 1.935286  | 3.613491  | 3.630296  |
| H | 2.528661  | 3.227112  | 4.483488  |
| H | 0.886862  | 3.306258  | 3.810798  |

|   |          |          |          |
|---|----------|----------|----------|
| H | 1.965682 | 4.723386 | 3.640505 |
| C | 2.355316 | 1.518284 | 2.262248 |
| H | 2.871269 | 1.056549 | 3.126469 |
| H | 2.778097 | 1.097324 | 1.326206 |
| H | 1.296697 | 1.196287 | 2.312126 |
| C | 6.248584 | 3.539309 | 2.586821 |
| H | 7.045511 | 3.051354 | 3.182478 |
| H | 6.535435 | 3.457404 | 1.520065 |
| C | 7.287581 | 5.881584 | 2.446365 |
| C | 7.160231 | 7.208467 | 3.207456 |
| H | 6.200287 | 7.713749 | 2.983186 |
| H | 7.978354 | 7.892179 | 2.909730 |
| H | 7.237087 | 7.058757 | 4.304676 |
| C | 7.139543 | 6.099839 | 0.933586 |
| H | 7.228927 | 5.157291 | 0.358386 |
| H | 7.939292 | 6.773996 | 0.569967 |
| H | 6.166417 | 6.576431 | 0.688821 |
| C | 8.638846 | 5.218532 | 2.781737 |
| H | 8.725787 | 4.980169 | 3.861679 |
| H | 9.459246 | 5.920978 | 2.535543 |
| H | 8.822456 | 4.295683 | 2.198352 |

**Coordinates for [(DBED)<sub>2</sub>Cu<sub>2</sub>(O<sub>2</sub>)]<sup>2+</sup>; d(O–O) = 1.70 Å**

|    |          |           |          |
|----|----------|-----------|----------|
| Cu | 2.537951 | 8.487391  | 2.008041 |
| Cu | 4.229461 | 5.553352  | 2.308012 |
| O  | 2.763535 | 6.618669  | 1.720345 |
| O  | 3.996554 | 7.415572  | 2.577438 |
| N  | 2.686745 | 10.327500 | 2.869951 |
| H  | 3.474738 | 10.794507 | 2.398315 |
| N  | 0.981516 | 9.198835  | 0.907314 |
| H  | 0.130118 | 8.913393  | 1.413837 |
| N  | 3.828729 | 3.574380  | 2.058703 |
| H  | 4.005620 | 3.382491  | 1.061711 |
| N  | 6.109620 | 5.032048  | 2.899076 |
| H  | 6.104937 | 5.123551  | 3.925225 |
| C  | 1.436985 | 11.041433 | 2.464393 |
| H  | 1.546842 | 12.139066 | 2.568807 |
| H  | 0.622939 | 10.724372 | 3.145987 |
| C  | 3.012352 | 10.357187 | 4.373666 |
| C  | 2.797944 | 11.777290 | 4.934448 |
| H  | 1.731591 | 12.073467 | 4.953907 |
| H  | 3.369046 | 12.537696 | 4.363509 |
| H  | 3.160680 | 11.814542 | 5.980076 |
| C  | 2.110289 | 9.338034  | 5.085221 |
| H  | 1.034052 | 9.586760  | 4.992197 |
| H  | 2.341974 | 9.322512  | 6.168141 |
| H  | 2.277605 | 8.312591  | 4.693366 |
| C  | 4.490927 | 9.965082  | 4.500364 |
| H  | 4.790856 | 9.956125  | 5.565593 |
| H  | 5.151462 | 10.686383 | 3.975862 |
| H  | 4.675990 | 8.952441  | 4.090317 |

|   |           |           |           |
|---|-----------|-----------|-----------|
| C | 1.095509  | 10.683504 | 1.026962  |
| H | 0.156892  | 11.188413 | 0.722647  |
| H | 1.894299  | 11.024372 | 0.338658  |
| C | 0.824558  | 8.655422  | -0.522947 |
| C | -0.229992 | 9.477818  | -1.290646 |
| H | -0.428876 | 8.994160  | -2.266949 |
| H | 0.104966  | 10.510596 | -1.506932 |
| H | -1.196429 | 9.519349  | -0.746745 |
| C | 2.190980  | 8.716038  | -1.222416 |
| H | 2.946161  | 8.107576  | -0.681817 |
| H | 2.570215  | 9.752653  | -1.322180 |
| H | 2.105572  | 8.307422  | -2.247762 |
| C | 0.343824  | 7.205039  | -0.375224 |
| H | 1.070332  | 6.599372  | 0.202598  |
| H | 0.230190  | 6.738334  | -1.372130 |
| H | -0.644025 | 7.153675  | 0.129238  |
| C | 4.899634  | 2.886676  | 2.842574  |
| H | 4.972252  | 1.813502  | 2.574790  |
| H | 4.632530  | 2.944539  | 3.916593  |
| C | 2.391357  | 3.100541  | 2.330060  |
| C | 1.538922  | 3.656164  | 1.181198  |
| H | 0.480274  | 3.360883  | 1.313302  |
| H | 1.869496  | 3.258398  | 0.198379  |
| H | 1.582045  | 4.763668  | 1.149357  |
| C | 1.933410  | 3.669153  | 3.681466  |
| H | 2.537813  | 3.289193  | 4.529736  |
| H | 0.887009  | 3.366093  | 3.879711  |
| H | 1.966349  | 4.778863  | 3.680126  |
| C | 2.329502  | 1.560266  | 2.326778  |
| H | 2.856764  | 1.105124  | 3.187633  |
| H | 2.737664  | 1.130096  | 1.388476  |
| H | 1.271009  | 1.240999  | 2.394805  |
| C | 6.228223  | 3.576440  | 2.578429  |
| H | 7.032396  | 3.096258  | 3.170560  |
| H | 6.503246  | 3.482500  | 1.509635  |
| C | 7.264438  | 5.915581  | 2.394549  |
| C | 7.153564  | 7.248913  | 3.146565  |
| H | 6.188801  | 7.752739  | 2.936898  |
| H | 7.965532  | 7.930164  | 2.826883  |
| H | 7.251900  | 7.108113  | 4.243282  |
| C | 7.092378  | 6.120402  | 0.882374  |
| H | 7.164843  | 5.171334  | 0.315738  |
| H | 7.891672  | 6.783984  | 0.498880  |
| H | 6.119397  | 6.602417  | 0.648998  |
| C | 8.619430  | 5.251829  | 2.713171  |
| H | 8.723449  | 5.020332  | 3.793122  |
| H | 9.436611  | 5.951739  | 2.449656  |
| H | 8.792475  | 4.325260  | 2.132533  |

**Coordinates for [(DBED)<sub>2</sub>Cu<sub>2</sub>(O<sub>2</sub>)]<sup>2+</sup>; d(O–O) = 1.80 Å**

|    |          |          |          |
|----|----------|----------|----------|
| Cu | 2.563957 | 8.427711 | 2.008472 |
|----|----------|----------|----------|



|    |           |           |           |
|----|-----------|-----------|-----------|
| Cu | 4.199174  | 5.605442  | 2.304399  |
| O  | 2.731602  | 6.590790  | 1.688267  |
| O  | 4.027835  | 7.438207  | 2.605690  |
| N  | 2.680568  | 10.258235 | 2.898562  |
| H  | 3.470981  | 10.736775 | 2.442480  |
| N  | 1.029791  | 9.154170  | 0.883816  |
| H  | 0.169407  | 8.846221  | 1.361349  |
| N  | 3.792013  | 3.621071  | 2.092997  |
| H  | 3.947338  | 3.412558  | 1.095683  |
| N  | 6.087864  | 5.082319  | 2.867255  |
| H  | 6.104219  | 5.193228  | 3.891424  |
| C  | 1.430397  | 10.967185 | 2.488121  |
| H  | 1.528061  | 12.063307 | 2.617311  |
| H  | 0.608030  | 10.626859 | 3.148282  |
| C  | 2.987842  | 10.273364 | 4.407665  |
| C  | 2.752779  | 11.685254 | 4.980181  |
| H  | 1.683597  | 11.971381 | 4.992958  |
| H  | 3.322412  | 12.457294 | 4.423450  |
| H  | 3.105562  | 11.714297 | 6.029531  |
| C  | 2.087108  | 9.237959  | 5.096803  |
| H  | 1.009540  | 9.475550  | 4.990163  |
| H  | 2.303116  | 9.216109  | 6.182856  |
| H  | 2.271715  | 8.218211  | 4.698856  |
| C  | 4.469033  | 9.895456  | 4.547370  |
| H  | 4.756674  | 9.877095  | 5.615952  |
| H  | 5.127594  | 10.630087 | 4.038903  |
| H  | 4.668736  | 8.889655  | 4.126442  |
| C  | 1.121302  | 10.637235 | 1.038838  |
| H  | 0.181464  | 11.134763 | 0.726671  |
| H  | 1.929563  | 11.004073 | 0.375248  |
| C  | 0.914609  | 8.647019  | -0.564891 |
| C  | -0.143432 | 9.468017  | -1.328656 |
| H  | -0.315478 | 9.005357  | -2.320183 |
| H  | 0.173043  | 10.512885 | -1.512784 |
| H  | -1.119978 | 9.475637  | -0.801239 |
| C  | 2.292247  | 8.758440  | -1.235204 |
| H  | 3.053203  | 8.157566  | -0.694444 |
| H  | 2.647306  | 9.805864  | -1.306146 |
| H  | 2.235153  | 8.370744  | -2.270385 |
| C  | 0.466479  | 7.182387  | -0.469263 |
| H  | 1.202129  | 6.577936  | 0.098717  |
| H  | 0.377529  | 6.744776  | -1.481987 |
| H  | -0.526312 | 7.090794  | 0.019651  |
| C  | 4.874483  | 2.940852  | 2.867133  |
| H  | 4.937315  | 1.863832  | 2.612593  |
| H  | 4.627396  | 3.016038  | 3.944822  |
| C  | 2.357585  | 3.157167  | 2.404264  |
| C  | 1.483018  | 3.692013  | 1.262254  |
| H  | 0.425811  | 3.406205  | 1.424359  |
| H  | 1.789747  | 3.271140  | 0.281329  |
| H  | 1.531831  | 4.798877  | 1.206528  |
| C  | 1.931135  | 3.756303  | 3.752635  |

|   |          |          |          |
|---|----------|----------|----------|
| H | 2.553726 | 3.394305 | 4.595553 |
| H | 0.889089 | 3.459641 | 3.980947 |
| H | 1.965491 | 4.865371 | 3.724878 |
| C | 2.292911 | 1.617639 | 2.433702 |
| H | 2.834605 | 1.178106 | 3.293670 |
| H | 2.682374 | 1.167939 | 1.496669 |
| H | 1.235003 | 1.302696 | 2.527467 |
| C | 6.198474 | 3.621548 | 2.568780 |
| H | 7.011533 | 3.150376 | 3.155903 |
| H | 6.455829 | 3.510059 | 1.497398 |
| C | 7.235913 | 5.953144 | 2.321568 |
| C | 7.156726 | 7.293724 | 3.064394 |
| H | 6.186369 | 7.799076 | 2.883988 |
| H | 7.960024 | 7.968697 | 2.710909 |
| H | 7.293556 | 7.161304 | 4.158157 |
| C | 7.023584 | 6.143754 | 0.812624 |
| H | 7.060742 | 5.186182 | 0.257075 |
| H | 7.824928 | 6.785700 | 0.397941 |
| H | 6.054391 | 6.642745 | 0.601560 |
| C | 8.593372 | 5.280498 | 2.609103 |
| H | 8.724036 | 5.053832 | 3.687185 |
| H | 9.407792 | 5.974153 | 2.321491 |
| H | 8.745061 | 4.350375 | 2.028375 |

**Coordinates for [(DBED)<sub>2</sub>Cu<sub>2</sub>(O<sub>2</sub>)]<sup>2+</sup>; d(O–O) = 1.90 Å**

|    |          |           |          |
|----|----------|-----------|----------|
| Cu | 2.590122 | 8.375761  | 2.014345 |
| Cu | 4.168455 | 5.653647  | 2.303119 |
| O  | 2.695762 | 6.566013  | 1.664733 |
| O  | 4.061649 | 7.460928  | 2.636061 |
| N  | 2.675758 | 10.199355 | 2.917473 |
| H  | 3.458033 | 10.691562 | 2.461458 |
| N  | 1.066822 | 9.101364  | 0.874728 |
| H  | 0.205088 | 8.764934  | 1.330051 |
| N  | 3.757491 | 3.668712  | 2.112973 |
| H  | 3.899655 | 3.453365  | 1.115015 |
| N  | 6.060196 | 5.127628  | 2.844433 |
| H  | 6.088231 | 5.250760  | 3.867067 |
| C  | 1.413252 | 10.890516 | 2.515303 |
| H  | 1.487606 | 11.985272 | 2.668323 |
| H  | 0.595029 | 10.518353 | 3.163206 |
| C  | 2.985112 | 10.215578 | 4.428068 |
| C  | 2.723624 | 11.621617 | 5.003318 |
| H  | 1.649377 | 11.887695 | 5.022595 |
| H  | 3.276626 | 12.405912 | 4.446954 |
| H  | 3.080969 | 11.654179 | 6.051068 |
| C  | 2.104441 | 9.162348  | 5.115862 |
| H  | 1.022425 | 9.379222  | 5.009273 |
| H  | 2.320733 | 9.145059  | 6.201929 |
| H  | 2.309232 | 8.146962  | 4.717784 |
| C  | 4.473744 | 9.867615  | 4.565238 |
| H  | 4.762070 | 9.851462  | 5.633721 |

|   |           |           |           |
|---|-----------|-----------|-----------|
| H | 5.116429  | 10.617670 | 4.058810  |
| H | 4.691673  | 8.867839  | 4.139203  |
| C | 1.123116  | 10.583331 | 1.058681  |
| H | 0.174841  | 11.063849 | 0.746232  |
| H | 1.928341  | 10.980700 | 0.409209  |
| C | 0.988225  | 8.624992  | -0.589236 |
| C | -0.058896 | 9.456172  | -1.356919 |
| H | -0.205963 | 9.011824  | -2.360801 |
| H | 0.253316  | 10.506746 | -1.513701 |
| H | -1.046852 | 9.445738  | -0.851156 |
| C | 2.379472  | 8.763669  | -1.224848 |
| H | 3.133012  | 8.155397  | -0.682432 |
| H | 2.727317  | 9.815285  | -1.263249 |
| H | 2.347841  | 8.401319  | -2.270252 |
| C | 0.549227  | 7.155785  | -0.539082 |
| H | 1.277753  | 6.543902  | 0.030028  |
| H | 0.485123  | 6.743369  | -1.564377 |
| H | -0.453612 | 7.045077  | -0.075140 |
| C | 4.846229  | 2.990188  | 2.879460  |
| H | 4.900531  | 1.911030  | 2.632571  |
| H | 4.612772  | 3.075529  | 3.959413  |
| C | 2.325012  | 3.207221  | 2.447642  |
| C | 1.438092  | 3.714774  | 1.302895  |
| H | 0.382549  | 3.434553  | 1.484702  |
| H | 1.733371  | 3.269213  | 0.329419  |
| H | 1.488932  | 4.819986  | 1.220207  |
| C | 1.911611  | 3.832292  | 3.788095  |
| H | 2.549697  | 3.494660  | 4.629588  |
| H | 0.875988  | 3.530198  | 4.037421  |
| H | 1.934812  | 4.940356  | 3.735063  |
| C | 2.266535  | 1.668439  | 2.508952  |
| H | 2.813014  | 1.247422  | 3.375122  |
| H | 2.651925  | 1.201265  | 1.578842  |
| H | 1.209765  | 1.353121  | 2.614021  |
| C | 6.166462  | 3.664158  | 2.558500  |
| H | 6.986682  | 3.199049  | 3.140153  |
| H | 6.410743  | 3.543417  | 1.485100  |
| C | 7.207508  | 5.988175  | 2.274556  |
| C | 7.163506  | 7.326622  | 3.023939  |
| H | 6.192504  | 7.840178  | 2.873387  |
| H | 7.963122  | 7.994483  | 2.649107  |
| H | 7.331887  | 7.187969  | 4.112638  |
| C | 6.963061  | 6.185006  | 0.771318  |
| H | 6.960546  | 5.226479  | 0.215895  |
| H | 7.772084  | 6.804155  | 0.337288  |
| H | 6.003925  | 6.711693  | 0.584811  |
| C | 8.562230  | 5.296668  | 2.529077  |
| H | 8.713267  | 5.060892  | 3.602465  |
| H | 9.377377  | 5.984695  | 2.230154  |
| H | 8.692020  | 4.370203  | 1.937561  |

**Coordinates for [(DBED)<sub>2</sub>Cu<sub>2</sub>(O<sub>2</sub>)]<sup>2+</sup>; d(O–O) = 2.10 Å**

|    |           |           |           |
|----|-----------|-----------|-----------|
| Cu | 2.631370  | 8.291809  | 2.022576  |
| Cu | 4.111299  | 5.720507  | 2.301951  |
| O  | 2.619378  | 6.515362  | 1.622050  |
| O  | 4.128364  | 7.500113  | 2.700580  |
| N  | 2.640952  | 10.109596 | 2.932546  |
| H  | 3.384832  | 10.641080 | 2.456199  |
| N  | 1.125046  | 8.983458  | 0.841962  |
| H  | 0.271215  | 8.563467  | 1.237937  |
| N  | 3.659684  | 3.744329  | 2.115931  |
| H  | 3.710326  | 3.556795  | 1.103494  |
| N  | 6.008017  | 5.158576  | 2.769267  |
| H  | 6.054322  | 5.220130  | 3.797163  |
| C  | 1.331336  | 10.723475 | 2.557275  |
| H  | 1.329031  | 11.813455 | 2.755156  |
| H  | 0.543033  | 10.267301 | 3.187900  |
| C  | 2.979231  | 10.157505 | 4.439174  |
| C  | 2.641394  | 11.551496 | 5.005883  |
| H  | 1.553393  | 11.749401 | 5.056377  |
| H  | 3.128811  | 12.363842 | 4.428856  |
| H  | 3.026567  | 11.616447 | 6.042247  |
| C  | 2.177503  | 9.061609  | 5.155194  |
| H  | 1.082125  | 9.208193  | 5.063294  |
| H  | 2.411559  | 9.076927  | 6.237602  |
| H  | 2.441518  | 8.056436  | 4.768844  |
| C  | 4.489327  | 9.909824  | 4.551360  |
| H  | 4.794775  | 9.918833  | 5.615167  |
| H  | 5.071463  | 10.699297 | 4.031510  |
| H  | 4.762302  | 8.924983  | 4.124601  |
| C  | 1.068812  | 10.456113 | 1.090272  |
| H  | 0.088621  | 10.875374 | 0.789379  |
| H  | 1.843249  | 10.939662 | 0.463073  |
| C  | 1.153575  | 8.576846  | -0.650228 |
| C  | 0.152787  | 9.437845  | -1.446982 |
| H  | 0.089126  | 9.040680  | -2.479024 |
| H  | 0.457028  | 10.499035 | -1.530565 |
| H  | -0.869457 | 9.387619  | -1.017842 |
| C  | 2.584877  | 8.761921  | -1.174305 |
| H  | 3.300214  | 8.118346  | -0.621718 |
| H  | 2.927055  | 9.815011  | -1.115527 |
| H  | 2.631982  | 8.473504  | -2.242475 |
| C  | 0.725105  | 7.104591  | -0.712986 |
| H  | 1.416234  | 6.463961  | -0.130117 |
| H  | 0.732694  | 6.755879  | -1.763876 |
| H  | -0.307744 | 6.963973  | -0.329537 |
| C  | 4.797300  | 3.028026  | 2.768354  |
| H  | 4.826137  | 1.962280  | 2.466500  |
| H  | 4.642643  | 3.060474  | 3.864885  |
| C  | 2.253031  | 3.290031  | 2.570217  |
| C  | 1.274851  | 3.759745  | 1.484902  |
| H  | 0.240641  | 3.473074  | 1.757263  |
| H  | 1.498695  | 3.289867  | 0.503858  |

|   |          |          |          |
|---|----------|----------|----------|
| H | 1.309071 | 4.862359 | 1.371061 |
| C | 1.945497 | 3.949120 | 3.922433 |
| H | 2.669415 | 3.658308 | 4.710299 |
| H | 0.946539 | 3.627240 | 4.275398 |
| H | 1.932408 | 5.054748 | 3.833157 |
| C | 2.209120 | 1.752872 | 2.678370 |
| H | 2.815131 | 1.357820 | 3.516448 |
| H | 2.530520 | 1.260906 | 1.737083 |
| H | 1.163089 | 1.439408 | 2.864548 |
| C | 6.091804 | 3.715975 | 2.389823 |
| H | 6.950367 | 3.220467 | 2.883928 |
| H | 6.258263 | 3.658557 | 1.296042 |
| C | 7.158078 | 6.040110 | 2.229647 |
| C | 7.183400 | 7.304220 | 3.099327 |
| H | 6.218039 | 7.843560 | 3.039072 |
| H | 7.982459 | 7.986062 | 2.749546 |
| H | 7.397840 | 7.060702 | 4.161437 |
| C | 6.861527 | 6.376912 | 0.761147 |
| H | 6.776306 | 5.470859 | 0.128144 |
| H | 7.688462 | 6.982803 | 0.341946 |
| H | 5.929848 | 6.972012 | 0.668387 |
| C | 8.500996 | 5.294010 | 2.366164 |
| H | 8.687632 | 4.960605 | 3.407448 |
| H | 9.319361 | 5.991597 | 2.100238 |
| H | 8.588824 | 4.423244 | 1.687722 |

**Coordinates for [(DBED)<sub>2</sub>Cu<sub>2</sub>(O<sub>2</sub>)]<sup>2+</sup>; d(O–O) = 2.30 Å**

|    |          |           |          |
|----|----------|-----------|----------|
| Cu | 2.660764 | 8.232256  | 2.028897 |
| Cu | 4.079232 | 5.778272  | 2.296586 |
| O  | 2.549547 | 6.466287  | 1.566879 |
| O  | 4.198889 | 7.548686  | 2.749286 |
| N  | 2.638924 | 10.039128 | 2.962802 |
| H  | 3.370376 | 10.585492 | 2.483962 |
| N  | 1.165033 | 8.922409  | 0.833409 |
| H  | 0.318452 | 8.467436  | 1.205323 |
| N  | 3.618477 | 3.799484  | 2.145999 |
| H  | 3.670648 | 3.601504  | 1.135597 |
| N  | 5.982775 | 5.220443  | 2.744160 |
| H  | 6.040521 | 5.310058  | 3.769426 |
| C  | 1.313556 | 10.621934 | 2.593601 |
| H  | 1.277960 | 11.705938 | 2.819114 |
| H  | 0.535592 | 10.126892 | 3.207559 |
| C  | 2.978937 | 10.095125 | 4.471101 |
| C  | 2.579735 | 11.471968 | 5.042335 |
| H  | 1.484336 | 11.622044 | 5.099284 |
| H  | 3.030360 | 12.307230 | 4.468004 |
| H  | 2.966938 | 11.548028 | 6.077168 |
| C  | 2.224593 | 8.965327  | 5.185198 |
| H  | 1.123998 | 9.061041  | 5.085192 |
| H  | 2.450106 | 8.996158  | 6.269160 |
| H  | 2.538327 | 7.973424  | 4.803609 |

|   |           |           |           |
|---|-----------|-----------|-----------|
| C | 4.499097  | 9.920798  | 4.584613  |
| H | 4.799890  | 9.938867  | 5.649767  |
| H | 5.041666  | 10.743468 | 4.073106  |
| H | 4.820925  | 8.954521  | 4.150905  |
| C | 1.071749  | 10.385697 | 1.119645  |
| H | 0.084621  | 10.788608 | 0.819065  |
| H | 1.840519  | 10.902981 | 0.512933  |
| C | 1.228904  | 8.560579  | -0.672295 |
| C | 0.265558  | 9.464526  | -1.469080 |
| H | 0.229489  | 9.098945  | -2.514097 |
| H | 0.588728  | 10.522422 | -1.511459 |
| H | -0.770602 | 9.417018  | -1.074801 |
| C | 2.677130  | 8.742179  | -1.148684 |
| H | 3.363886  | 8.060568  | -0.606148 |
| H | 3.034126  | 9.785583  | -1.030967 |
| H | 2.749237  | 8.502484  | -2.227687 |
| C | 0.776928  | 7.099768  | -0.800778 |
| H | 1.435388  | 6.428082  | -0.215836 |
| H | 0.815706  | 6.789210  | -1.862920 |
| H | -0.271519 | 6.966294  | -0.459602 |
| C | 4.759016  | 3.098906  | 2.810006  |
| H | 4.779658  | 2.024670  | 2.538960  |
| H | 4.614196  | 3.164586  | 3.906467  |
| C | 2.213170  | 3.340162  | 2.608171  |
| C | 1.233036  | 3.734950  | 1.495052  |
| H | 0.203590  | 3.441430  | 1.778116  |
| H | 1.471015  | 3.218242  | 0.541292  |
| H | 1.247097  | 4.829986  | 1.324836  |
| C | 1.882499  | 4.049276  | 3.928841  |
| H | 2.612571  | 3.813066  | 4.729521  |
| H | 0.892446  | 3.712873  | 4.293095  |
| H | 1.838226  | 5.148399  | 3.790547  |
| C | 2.197273  | 1.807988  | 2.786132  |
| H | 2.799250  | 1.461286  | 3.648265  |
| H | 2.534259  | 1.278235  | 1.871152  |
| H | 1.154007  | 1.487897  | 2.976298  |
| C | 6.050660  | 3.768425  | 2.397899  |
| H | 6.913141  | 3.280092  | 2.892047  |
| H | 6.202066  | 3.685273  | 1.303595  |
| C | 7.136384  | 6.076051  | 2.164413  |
| C | 7.218139  | 7.347470  | 3.019614  |
| H | 6.262932  | 7.905796  | 2.985672  |
| H | 8.020785  | 8.006980  | 2.636356  |
| H | 7.463463  | 7.109393  | 4.076339  |
| C | 6.807532  | 6.401281  | 0.700477  |
| H | 6.685557  | 5.488947  | 0.082450  |
| H | 7.636592  | 6.982593  | 0.251782  |
| H | 5.886970  | 7.015405  | 0.625538  |
| C | 8.466918  | 5.301817  | 2.272238  |
| H | 8.674259  | 4.973636  | 3.311144  |
| H | 9.290255  | 5.983156  | 1.980830  |
| H | 8.523161  | 4.425142  | 1.597955  |

## References

- [1] P. Glatzel, M. Sikora, G. Smolentsev, M. Fernandez-Garcia, *Catalysis Today* **2009**, *145*, 294-299.
- [2] F. Neese, *Wires Comput Mol Sci* **2012**, *2*, 73-78.
- [3] A. D. Becke, *J Chem Phys* **1993**, *98*, 5648-5652.
- [4] F. Weigend, R. Ahlrichs, *Phys Chem Chem Phys* **2005**, *7*, 3297-3305.
- [5] F. Weigend, *Phys Chem Chem Phys* **2006**, *8*, 1057-1065.
- [6] D. G. Liakos, F. Neese, *J Chem Theory Comput* **2011**, *7*, 1511-1523.
- [7] a) B. Lassalle-Kaiser, T. T. Boron, V. Krewald, J. Kern, M. A. Beckwith, M. U. Delgado-Jaime, H. Schroeder, R. Alonso-Mori, D. Nordlund, T. C. Weng, D. Sokaras, F. Neese, U. Bergmann, V. K. Yachandra, S. DeBeer, V. L. Pecoraro, J. Yano, *Inorg. Chem.* **2013**, *52*, 12915-12922; b) M. A. Beckwith, M. Roemelt, M. N. Collomb, C. DuBoc, T. C. Weng, U. Bergmann, P. Glatzel, F. Neese, S. DeBeer, *Inorg. Chem.* **2011**, *50*, 8397-8409; c) N. Lee, T. Petrenko, U. Bergmann, F. Neese, S. DeBeer, *J. Am. Chem. Soc.* **2010**, *132*, 9715-9727.
- [8] J. L. DuBois, P. Mukherjee, T. D. P. Stack, B. Hedman, E. I. Solomon, K. O. Hodgson, *J. Am. Chem. Soc.* **2000**, *122*, 5775-5787.
